# Supplementary material
Source: HighWire-hosted journal article supplement (https://www.annfammed.org/highwire/filestream/14888/field_highwire_adjunct_files/0/RonksleySuppApps.pdf)
Supplement: RonksleySuppApps.pdf [file RonksleySuppApps.pdf]

## Supplemental materials for

Chong C, Campbell D, Elliott M, Aghajafari F, Ronksley P. Determining the association between continuity of primary care and acute care use in chronic kidney disease: a retrospective cohort study. *Ann Fam Med.* 2022;20(3):237-245.

**Supplemental Table 1. Patient demographic and clinical characteristics by continuity of primary care overall and across CKD stage.**

|              | Variable                                       | Level of relational continuity of primary care |                        |                   | Overall       |
|--------------|------------------------------------------------|------------------------------------------------|------------------------|-------------------|---------------|
|              |                                                | Poor<br>(<50%)                                 | Moderate<br>(50 – 74%) | High<br>(75-100%) |               |
| CKD Stage 3a | Age, mean (SD)                                 | 74.9 (12.2)                                    | 74.4 (11.0)            | 75.1 (10.2)       | 74.8 (10.8)   |
|              | Female, n (%)                                  | 5,336 (58.3)                                   | 8,785 (56.7)           | 14,763 (54.1)     | 28,884 (55.6) |
|              | Urban location of residence, n (%)             | 7,594 (83.0)                                   | 13,237 (85.5)          | 24,944 (91.5)     | 45,775 (88.2) |
|              | <i>Albuminuria, n (%)</i>                      |                                                |                        |                   |               |
|              | Normal/mild (A1)                               | 4,848 (53.0)                                   | 8,940 (57.7)           | 16,221 (59.5)     | 30,009 (57.8) |
|              | Moderate (A2)                                  | 965 (10.5)                                     | 1,606 (10.4)           | 2,937 (10.8)      | 5,508 (10.6)  |
|              | Severe (A3)                                    | 547 (6.0)                                      | 772 (5.0)              | 1,208 (4.4)       | 2,527 (4.9)   |
|              | Unmeasured                                     | 2,793 (30.5)                                   | 4,171 (26.9)           | 6,908 (25.3)      | 13,872 (26.7) |
|              | <i>Median household income quintile, n (%)</i> |                                                |                        |                   |               |
|              | 1 (lowest)                                     | 2,524 (27.6)                                   | 3,904 (25.2)           | 6,520 (23.9)      | 12,948 (24.9) |
|              | 2                                              | 2,042 (22.3)                                   | 3,503 (22.6)           | 6,037 (22.1)      | 11,582 (22.3) |
|              | 3                                              | 1,655 (18.1)                                   | 2,969 (19.2)           | 5,376 (19.7)      | 10,000 (19.3) |
|              | 4                                              | 1,355 (14.8)                                   | 2,314 (14.9)           | 4,249 (15.6)      | 7,918 (15.3)  |
|              | 5 (highest)                                    | 1,266 (13.8)                                   | 2,394 (15.5)           | 4,559 (16.7)      | 8,219 (15.8)  |
|              | 6 = Unknown                                    | 311 (3.4)                                      | 405 (2.6)              | 533 (2.0)         | 1,249 (2.4)   |

|              |                                                |              |              |               |               |
|--------------|------------------------------------------------|--------------|--------------|---------------|---------------|
|              | Number of comorbidities, mean (SD)             | 3.6 (2.2)    | 3.1 (1.9)    | 2.7 (1.7)     | 3.0 (1.9)     |
|              | Number of specialists seen, mean (SD)          | 3.8 (2.9)    | 3.3 (2.6)    | 2.9 (2.3)     | 3.2 (2.5)     |
| CKD Stage 3b | Age, mean (SD)                                 | 78.0 (12.2)  | 77.8 (11.2)  | 78.1 (10.3)   | 78.0 (11.0)   |
|              | Female, n (%)                                  | 3,158 (61.4) | 4,699 (59.0) | 7,589 (57.0)  | 15,446 (58.5) |
|              | Urban location of residence, n (%)             | 4,153 (80.7) | 6,684 (84.0) | 11,982 (90.0) | 22,819 (86.4) |
|              | <i>Albuminuria, n (%)</i>                      |              |              |               |               |
|              | Normal/mild (A1)                               | 2,258 (43.9) | 3,717 (46.7) | 6,520 (49.0)  | 12,495 (47.3) |
|              | Moderate (A2)                                  | 722 (14.0)   | 1,149 (14.4) | 1,948 (14.6)  | 3,819 (14.5)  |
|              | Severe (A3)                                    | 487 (9.5)    | 697 (8.8)    | 1,078 (8.1)   | 2,262 (8.6)   |
|              | Unmeasured                                     | 1,678 (32.6) | 2,397 (30.1) | 3,767 (28.3)  | 7,842 (29.7)  |
|              | <i>Median household income quintile, n (%)</i> |              |              |               |               |
|              | 1 (lowest)                                     | 1,540 (29.9) | 2,276 (28.6) | 3,538 (26.6)  | 7,354 (27.8)  |
|              | 2                                              | 1,195 (23.2) | 1,804 (22.7) | 3,064 (23.0)  | 6,063 (23.0)  |
|              | 3                                              | 973 (18.9)   | 1,571 (19.7) | 2,647 (19.9)  | 5,191 (19.7)  |
|              | 4                                              | 665 (12.9)   | 1,063 (13.4) | 1,846 (13.9)  | 3,574 (13.5)  |
|              | 5 (highest)                                    | 579 (11.3)   | 1,012 (12.7) | 1,923 (14.4)  | 3,514 (13.3)  |
|              | 6 = Unknown                                    | 193 (3.8)    | 234 (2.9)    | 295 (2.2)     | 722 (2.7)     |
|              | Number of comorbidities, mean (SD)             | 3.2 (1.8)    | 3.7 (2.0)    | 4.2 (2.2)     | 3.6 (2.0)     |
|              | Number of specialists seen, mean (SD)          | 4.1 (2.9)    | 3.6 (2.6)    | 3.2 (2.3)     | 3.5 (2.6)     |
| CKD Stage 4  | Age, mean (SD)                                 | 76.6 (14.8)  | 77.1 (13.2)  | 77.8 (12.0)   | 77.3 (13.1)   |
|              | Female, n (%)                                  | 1,077 (58.4) | 1,418 (56.7) | 2,131 (56.1)  | 4,626 (56.8)  |
|              | Urban location of residence, n (%)             | 1,474 (79.9) | 2,057 (82.3) | 3,413 (89.9)  | 6,944 (85.3)  |
|              | <i>Albuminuria, n (%)</i>                      |              |              |               |               |

|  |                                                |            |            |              |              |
|--|------------------------------------------------|------------|------------|--------------|--------------|
|  | Normal/mild (A1)                               | 495 (26.8) | 801 (32.1) | 1,250 (32.9) | 2,546 (31.3) |
|  | Moderate (A2)                                  | 334 (18.1) | 466 (18.7) | 775 (20.4)   | 1,575 (19.4) |
|  | Severe (A3)                                    | 406 (22.0) | 538 (21.5) | 693 (18.3)   | 1,637 (20.1) |
|  | Unmeasured                                     | 610 (33.1) | 694 (27.8) | 1,079 (28.4) | 2,383 (29.3) |
|  | <i>Median household income quintile, n (%)</i> |            |            |              |              |
|  | 1 (lowest)                                     | 563 (30.5) | 764 (30.6) | 1,072 (28.2) | 2,399 (29.5) |
|  | 2                                              | 436 (23.6) | 586 (23.5) | 935 (24.6)   | 1,957 (24.0) |
|  | 3                                              | 330 (17.9) | 472 (18.9) | 712 (18.8)   | 1,514 (18.6) |
|  | 4                                              | 226 (12.3) | 310 (12.4) | 481 (12.7)   | 1,017 (12.5) |
|  | 5 (highest)                                    | 217 (11.8) | 280 (11.2) | 504 (13.3)   | 1,001 (12.3) |
|  | 6 = Unknown                                    | 73 (4.0)   | 87 (3.5)   | 93 (2.5)     | 253 (3.11)   |
|  | Number of comorbidities, mean (SD)             | 4.6 (2.3)  | 4.1 (2.2)  | 3.6 (1.9)    | 4.0 (2.1)    |
|  | Number of specialists seen, mean (SD)          | 4.5 (3.0)  | 4.0 (2.8)  | 3.5 (2.5)    | 3.9 (2.7)    |

**Supplemental Figure 1. The association between continuity of primary care and incident rate ratios of all-cause and ambulatory care-sensitive conditions (ACSC) hospitalizations and Emergency Department (ED) visits.**

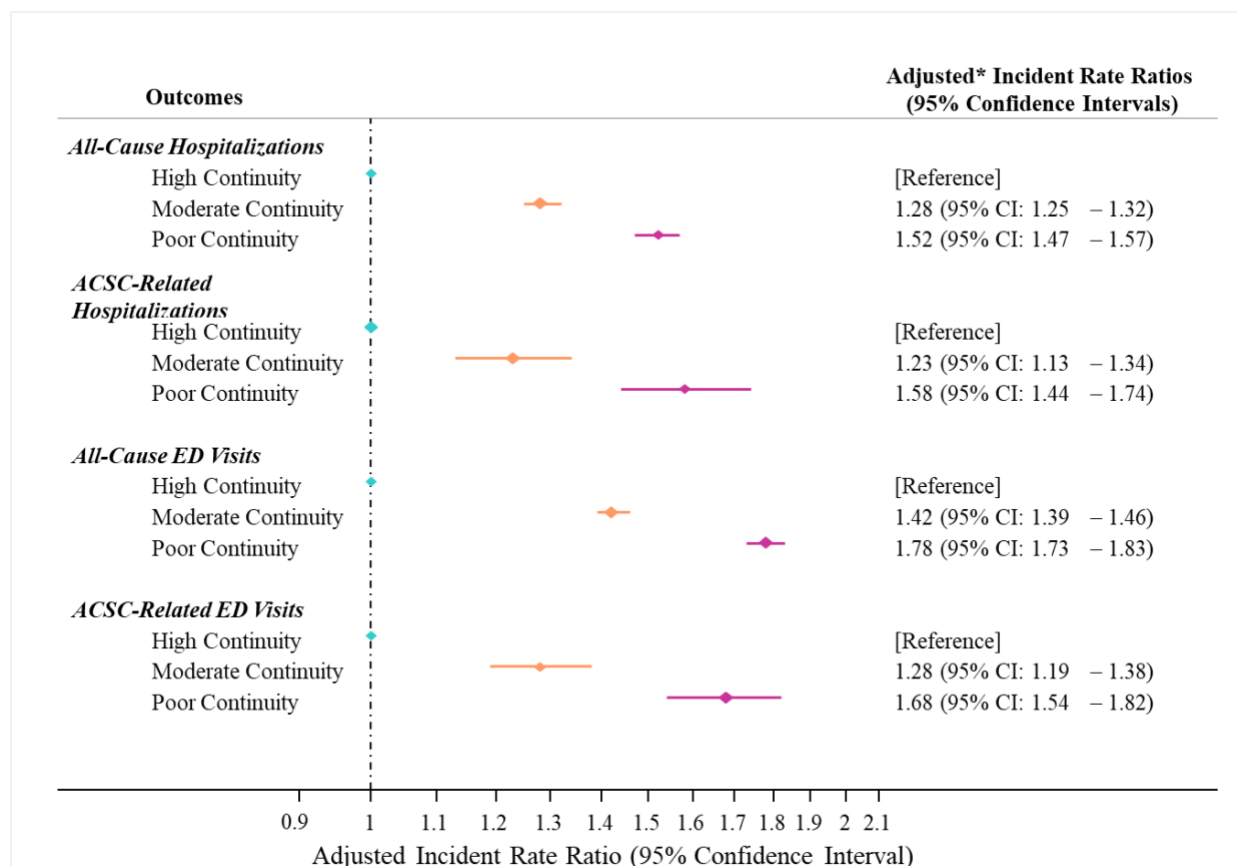

\* All-cause models adjusted by age, sex, household location, median household income quintile, cirrhosis, chronic heart failure, peripheral vascular disease, atrial fibrillation, asthma, chronic obstructive pulmonary disease, cancer, diabetes, hypertension, and albuminuria severity. ACSC-related models adjusted by age, sex, household location, median household income quintile, cirrhosis, peripheral vascular disease, atrial fibrillation, asthma, chronic obstructive pulmonary disease, cancer, diabetes, and albuminuria severity

**Supplemental Figure 2. The association between continuity of primary care and incident rate ratios of all-cause hospitalizations and Emergency Department (ED) visits by CKD stage.**

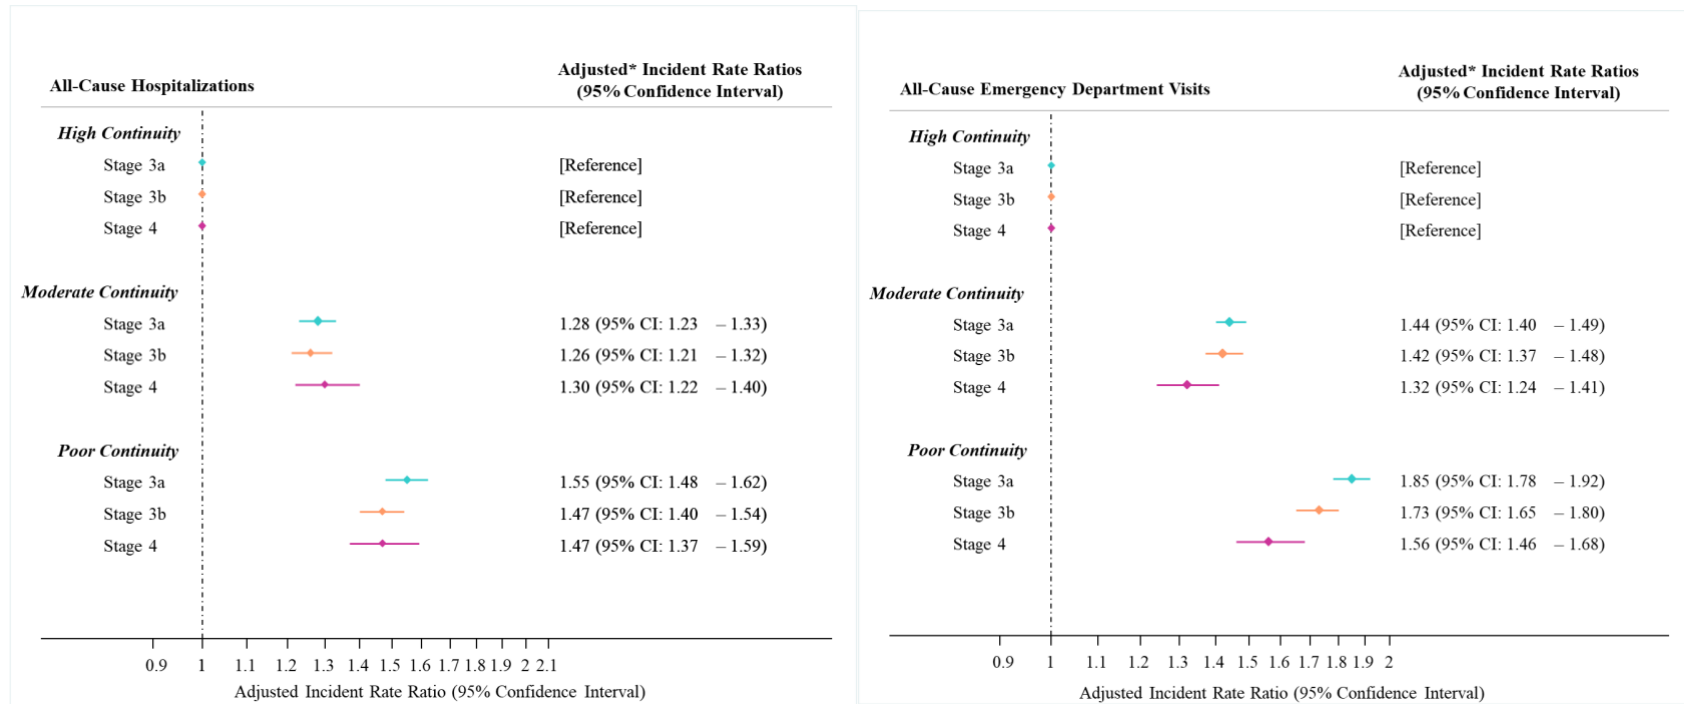

\* Adjusted by age, sex, household location, median household income quintile, cirrhosis, chronic heart failure, peripheral vascular disease, atrial fibrillation, asthma, chronic obstructive pulmonary disease, cancer, diabetes, hypertension, and albuminuria severity.

**Supplemental Table 2. All-cause hospitalization characteristics by level of continuity of primary care, overall and across CKD stage.**

|              | Variable                                                     | Level of relational continuity of primary care |                        |                       | Overall,              |
|--------------|--------------------------------------------------------------|------------------------------------------------|------------------------|-----------------------|-----------------------|
|              |                                                              | Poor<br>(<50%)                                 | Moderate<br>(50 – 74%) | High<br>(75-100%)     |                       |
| Overall      | Number of individuals                                        | 7,938                                          | 11,020                 | 15,852                | 34,810                |
|              | Total number of hospitalizations (% of all hospitalizations) | 19,835 (25.4)                                  | 25,551 (32.8)          | 32,602 (41.8)         | 77,988 (100.0)        |
|              | Number of hospitalizations, median (IQR)                     | 0 (0 – 2)                                      | 0 (0 – 1)              | 0 (0 – 1)             | 0 (0 – 1)             |
|              | Person-time, years (% of all person-time)                    | 32,328.8 (17.9)                                | 53,698.6 (29.7)        | 94,520.5 (52.4)       | 180,547.9 (100.0)     |
|              | Length of hospital stays, days, mean (SD)                    | 13.7 (21.1)                                    | 12.8 (19.2)            | 12.7 (20.0)           | 12.9 (20.0)           |
|              | Length of hospital stays, days, median (IQR)                 | 0 (0 – 7)                                      | 0 (0 – 5)              | 0 (0 – 4)             | 0 (0 – 5)             |
|              | Cumulative length of hospital stays, days, median (IQR)      | 15 (6 – 42)                                    | 13 (5 – 39)            | 11 (4 – 33)           | 13 (5 – 37)           |
|              | Unadjusted hospitalization rate (per 1,000 p-y) (95% CI)     | 613.5 (605.6 – 622.7)                          | 475.8 (470.2 – 481.9)  | 344.9 (341.9 – 349.4) | 432.0 (429.5 – 435.6) |
| CKD Stage 3a | Number of individuals                                        | 3,684                                          | 5,320                  | 7,798                 | 16,802                |
|              | Total number of hospitalizations (% of all hospitalizations) | 8,282 (24.5)                                   | 10,919 (32.4)          | 14,543 (43.1)         | 33,744 (100.0)        |
|              | Number of hospitalizations, median (IQR)                     | 0 (0 – 1)                                      | 0 (0 – 1)              | 0 (0 – 1)             | 0 (0 – 1)             |
|              | Person-time, years (% of all person-time)                    | 17,409.1 (16.9)                                | 30,430.3 (29.5)        | 55,277.2 (53.6)       | 103,116.6 (100.0)     |
|              | Length of hospital stays, days, mean (SD)                    | 13.0 (22.4)                                    | 12.2 (20.8)            | 11.2 (18.1)           | 11.9 (20.0)           |

|              |                                                              |                       |                       |                       |                       |
|--------------|--------------------------------------------------------------|-----------------------|-----------------------|-----------------------|-----------------------|
|              | Length of hospital stays, days, median (IQR)                 | 0 (0 – 4.5)           | 0 (0 – 3)             | 0 (0 – 2)             | 0 (0 – 3)             |
|              | Cumulative length of hospital stays, days median (IQR)       | 12 (4 – 35)           | 10 (4 – 30)           | 9 (4 – 24)            | 10 (4 – 29)           |
|              | Unadjusted hospitalization rate (per 1,000 p-y) (95% CI)     | 475.7 (465.6 – 486.1) | 358.8 (352.2 – 365.6) | 263.1 (258.9 – 267.4) | 327.2 (323.8 – 330.8) |
| CKD Stage 3b | Number of individuals                                        | 2,974                 | 4,105                 | 5,942                 | 13,021                |
|              | Total number of hospitalizations (% of all hospitalizations) | 7,823 (25.2)          | 10,187 (32.9)         | 12,983 (41.9)         | 30,993 (100.0)        |
|              | Number of hospitalizations, median (IQR)                     | 1 (0 – 2)             | 1 (0 – 2)             | 0 (0 – 1)             | 0 (0 – 2)             |
|              | Person-time, years (% of all person-time)                    | 11,014.5 (18.6)       | 17,789.3 (30.0)       | 30,451.5 (51.4)       | 59,255.4 (100.0)      |
|              | Length of hospital stays, days, mean (SD)                    | 14.1 (19.7)           | 13.3 (17.8)           | 13.7 (21.6)           | 13.6 (20.1)           |
|              | Length of hospital stays, days, median (IQR)                 | 2.7 (0 – 9)           | 1 (0 – 7.5)           | 0 (0 – 6.1)           | 0 (0 – 7)             |
|              | Cumulative length of hospital stays, days median (IQR)       | 17 (6 – 45)           | 16 (6 – 45)           | 14 (5 – 38)           | 15 (5 – 42)           |
|              | Unadjusted hospitalization rate (per 1,000 p-y) (95% CI)     | 710.2 (694.7 – 726.2) | 572.6 (561.6 – 583.9) | 426.4 (419.1 – 433.8) | 523.0 (517.3 – 528.9) |
| CKD Stage 4  | Number of individuals                                        | 1,280                 | 1,595                 | 2,112                 | 4,987                 |
|              | Total number of hospitalizations (% of all hospitalizations) | 3,730 (28.1)          | 4,445 (33.5)          | 5,076 (38.3)          | 13,251 (100.0)        |
|              | Number of hospitalizations, median (IQR)                     | 1 (0 – 3)             | 1 (0 – 3)             | 1 (0 – 2)             | 1 (0 – 2)             |
|              | Person-time, years (% of all person-time)                    | 3,877 (21.6)          | 5,458.8 (30.4)        | 8,593.7 (47.9)        | 17,929.9 (100.0)      |
|              | Length of hospital stays, days, mean (SD)                    | 15.1 (20.6)           | 13.8 (17.4)           | 15.7 (21.2)           | 14.9 (19.9)           |
|              | Length of hospital stays, days, median (IQR)                 | 5.5 (0 – 13)          | 4 (0 – 11)            | 2 (0 – 10.8)          | 4 (0 – 11)            |
|              | Cumulative length of hospital stays, days median (IQR)       | 23 (9 – 55)           | 20 (7 – 50)           | 20 (7 – 49)           | 21 (8 – 51)           |

|  |                                                          |                       |                       |                       |                       |
|--|----------------------------------------------------------|-----------------------|-----------------------|-----------------------|-----------------------|
|  | Unadjusted hospitalization rate (per 1,000 p-y) (95% CI) | 962.1 (931.6 – 993.4) | 814.3 (790.7 – 838.6) | 590.7 (574.6 – 607.1) | 739.0 (726.6 – 751.7) |
|--|----------------------------------------------------------|-----------------------|-----------------------|-----------------------|-----------------------|



**Supplemental Table 3. All-cause Emergency Department (ED) visit characteristics by level of continuity of primary care, overall and across CKD stage.**

|              | Variable                                          | Level of relational continuity of primary care |                             |                       | Overall                     |
|--------------|---------------------------------------------------|------------------------------------------------|-----------------------------|-----------------------|-----------------------------|
|              |                                                   | Poor<br>(<50%)                                 | Moderate<br>(50 – 74%)      | High<br>(75-100%)     |                             |
| Overall      | Number of individuals                             | 11,234                                         | 16,237                      | 23,681                | 51,152                      |
|              | Total number of ED visits (%)                     | 56,809 (27.8)                                  | 70,147 (34.3)               | 77,659 (38.0)         | 204,615 (100.0)             |
|              | Number of ED visits, median (IQR)                 | 2 (0 – 4)                                      | 1 (0 – 3)                   | 1 (0 – 2)             | 1 (0 – 3)                   |
|              | Person-time, years (% of all person-time)         | 32,328.8 (17.9)                                | 53,698.6 (29.7)             | 94,520.5 (52.4)       | 180,547.9 (100.0)           |
|              | Unadjusted ED visit rate (per 1,000 p-y) (95% CI) | 1,757.2 (1,744.3 – 1,773.3)                    | 1,306.3 (1,297.2 – 1,316.5) | 823.4 (817.6 – 829.2) | 1,133.3 (1,129.9 – 1,139.8) |
| CKD Stage 3a | Number of individuals                             | 5,739                                          | 8,582                       | 12,568                | 26,889                      |
|              | Total number of ED visits (%)                     | 25,137 (26.8)                                  | 32,359 (34.6)               | 36,134 (38.6)         | 93,630 (100.0)              |
|              | Number of ED visits, median (IQR)                 | 1 (0 – 3)                                      | 1 (0 – 2)                   | 0 (0 – 2)             | 1 (0 – 2)                   |
|              | Person-time, years (% of all person-time)         | 17,409.1 (16.9)                                | 30,430.3 (29.5)             | 55,277.2 (53.6)       | 103,116.6 (100.0)           |
|              | Unadjusted ED visit rate (per 1,000 p-y) (95% CI) | 1,443.9 (1,426.2 – 1,461.9)                    | 1,063.4 (1,051.9 – 1,075.0) | 653.7 (647.0 – 660.5) | 908.0 (902.2 – 913.8)       |
| CK           | Number of individuals                             | 3,930                                          | 5,673                       | 8,318                 | 17,921                      |

|             |                                                   |                             |                             |                             |                             |
|-------------|---------------------------------------------------|-----------------------------|-----------------------------|-----------------------------|-----------------------------|
|             | Total number of ED visits (%)                     | 22,244 (28.1)               | 26,978 (34.1)               | 29,928 (37.8)               | 79,150 (100.0)              |
|             | Number of ED visits, median (IQR)                 | 2 (1 – 5)                   | 2 (0 – 4)                   | 1 (0 – 3)                   | 1 (0 – 4)                   |
|             | Person-time, years (% of all person-time)         | 11,014.5 (18.6)             | 17,789.3 (30.0)             | 30,451.5 (51.4)             | 59,255.4 (100.0)            |
|             | Unadjusted ED visit rate (per 1,000 p-y) (95% CI) | 2,019.5 (1,993.2 – 2,046.2) | 1,516.5 (1,498.5 – 1,534.7) | 982.8 (971.8 – 994.1)       | 1,335.7 (1,326.5 – 1,345.1) |
| CKD Stage 4 | Number of individuals                             | 1,565                       | 1,982                       | 2,795                       | 6,342                       |
|             | Total number of ED visits (%)                     | 9,428 (29.6)                | 10,810 (34.0)               | 11,597 (36.4)               | 31,835 (100.0)              |
|             | Number of ED visits, median (IQR)                 | 3 (1 – 6)                   | 2 (1 – 6)                   | 2 (0 – 4)                   | 2 (1 – 5)                   |
|             | Person-time, years (% of all person-time)         | 3,877 (21.6)                | 5,458.8 (30.4)              | 8,593.7 (47.9)              | 17,929.9 (100.0)            |
|             | Unadjusted ED visit rate (per 1,000 p-y) (95% CI) | 2,431.8 (2,382.9 – 2,481.1) | 1,980.3 (1,943.3 – 2,018.0) | 1,349.5 (1,325.1 – 1,374.3) | 1,775.5 (1,756.1 – 1795.1)  |

**Supplemental Table 4. Number and percentage of encounters for individual CKD-related ACSC hospitalizations and emergency department visits.**

|                             |                                            | Level of continuity of primary care |          |       |         |
|-----------------------------|--------------------------------------------|-------------------------------------|----------|-------|---------|
|                             |                                            | High                                | Moderate | Poor  | Overall |
| Hospitalizations            | # of ACSC encounters                       | 2,730                               | 2,045    | 1,714 | 6,489   |
|                             | % of all ACSC encounters                   | 42.1                                | 31.5     | 26.4  | 100.0   |
|                             | Volume overload                            | 20                                  | 2        | 5     | 27      |
|                             | % of all Volume overload encounters        | 74.0                                | 0.7      | 1.9   | 100.0   |
|                             | Hyperkalemia                               | 76                                  | 69       | 71    | 216     |
|                             | % of all Hyperkalemia encounters           | 35.2                                | 31.9     | 32.9  | 100.0   |
|                             | Malignant hypertension                     | 5                                   | 3        | 4     | 12      |
|                             | % of all Malignant hypertension encounters | 41.7                                | 25.0     | 33.3  | 100.0   |
| Emergency Department Visits | Heart failure                              | 2,653                               | 1,989    | 1,649 | 6,291   |
|                             | % of all Heart failure encounters          | 42.2                                | 31.6     | 26.2  | 100.0   |
|                             | # of ACSC encounters                       | 3,441                               | 2,726    | 2,294 | 8,461   |
|                             | % of all ACSC encounters                   | 40.7                                | 32.2     | 27.1  | 100.0   |
|                             | Volume overload                            | 25                                  | 7        | 10    | 42      |
|                             | % of all Volume overload encounters        | 59.5                                | 16.7     | 23.8  | 100.0   |
|                             | Hyperkalemia                               | 419                                 | 365      | 332   | 1,116   |
|                             | % of all Hyperkalemia encounters           | 37.5                                | 32.7     | 29.7  | 100.0   |
|                             | Malignant hypertension                     | 14                                  | 5        | 6     | 25      |
|                             | % of all Malignant hypertension encounters | 56.0                                | 20.0     | 24.0  | 100.0   |
|                             | Heart failure                              | 3,057                               | 2,425    | 2,024 | 7,506   |
|                             | % of all Heart failure encounters          | 40.7                                | 32.3     | 27.0  | 100.0   |

**Supplemental Figure 3. The association between continuity of primary care and incident rate ratios of ambulatory care-sensitive conditions (ACSC) hospitalizations and Emergency Department (ED) visits by CKD stage.**

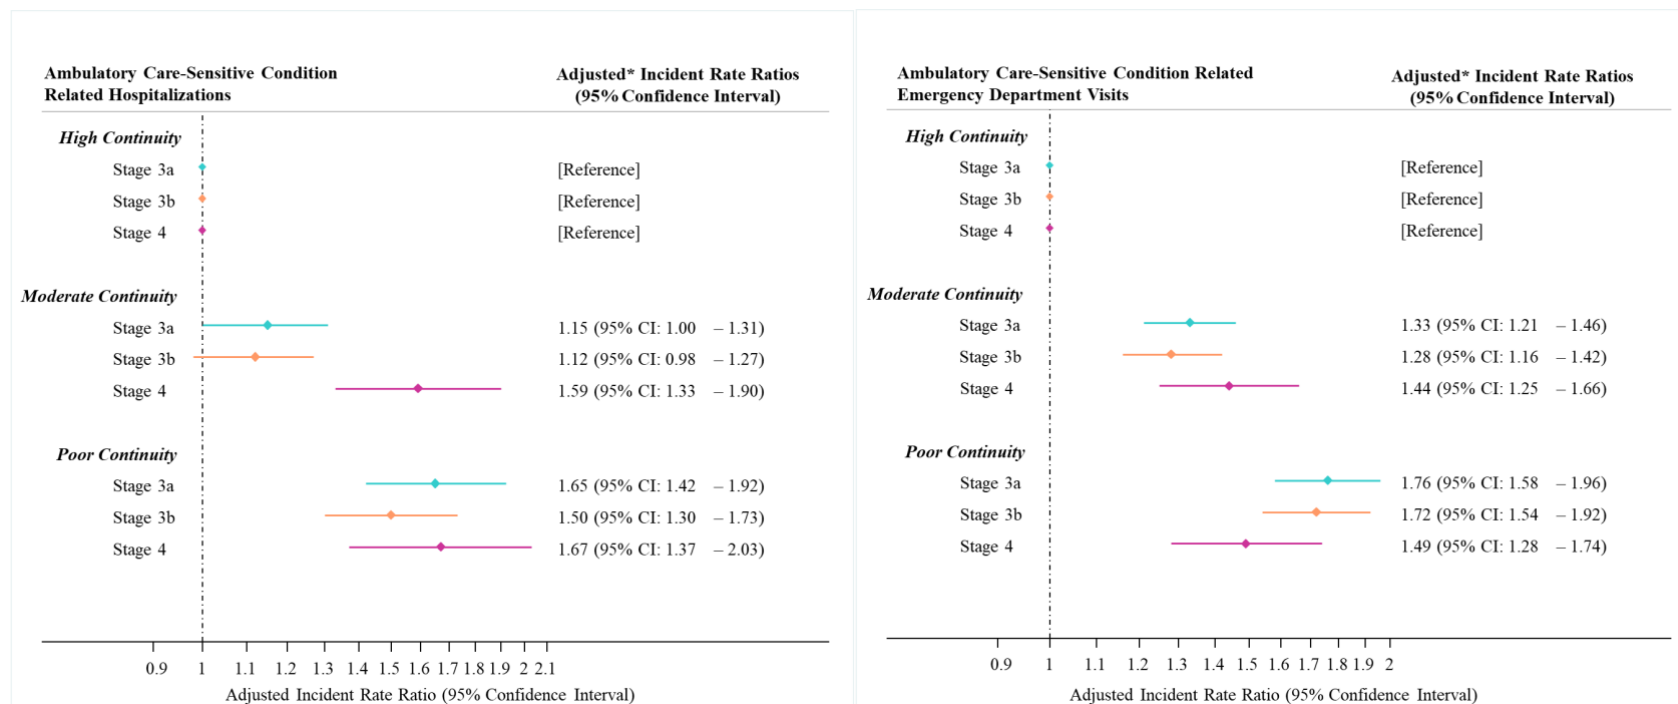

\* Adjusted by age, sex, household location, median household income quintile, cirrhosis, peripheral vascular disease, atrial fibrillation, asthma, chronic obstructive pulmonary disease, cancer, diabetes, and albuminuria severity.



**Supplemental Table 5. Ambulatory care-sensitive condition (ACSC) related hospitalization characteristics by level of continuity of primary care, overall and across CKD stage.**

|              | Variable                                                      | Level of relational continuity of primary care |                        |                    | Overall            |
|--------------|---------------------------------------------------------------|------------------------------------------------|------------------------|--------------------|--------------------|
|              |                                                               | Poor<br>(<50%)                                 | Moderate<br>(50 – 74%) | High<br>(75-100%)  |                    |
| Overall      | Number of individuals                                         | 1,095                                          | 1,369                  | 1,842              | 4,306              |
|              | Total number of ACSC hospitalizations (%)                     | 1,714 (26.4)                                   | 2,045 (31.5)           | 2,730 (42.1)       | 6,489 (100.0)      |
|              | Number of ACSC hospitalizations, median (IQR)                 | 0 (0 – 0)                                      | 0 (0 – 0)              | 0 (0 – 0)          | 0 (0 – 0)          |
|              | Person-time, years (% of all person-time)                     | 32,328.8 (17.9)                                | 53,698.6 (29.7)        | 94,520.5 (52.4)    | 180,547.9 (100.0)  |
|              | Unadjusted ACSC hospitalization rate (per 1,000 p-y) (95% CI) | 53.1 (50.6 – 55.6)                             | 38.1 (36.5 – 39.8)     | 28.9 (27.9 – 30.1) | 36.0 (35.1 – 36.9) |
| CKD Stage 3a | Number of individuals                                         | 391                                            | 489                    | 706                | 1,586              |
|              | Total number of ACSC hospitalizations (%)                     | 594                                            | 689                    | 1,024              | 2,307              |
|              | Number of ACSC hospitalizations, median (IQR)                 | 0 (0 – 0)                                      | 0 (0 – 0)              | 0 (0 – 0)          | 0 (0 – 0)          |
|              | Person-time, years (% of all person-time)                     | 17,409.1 (16.9)                                | 30,430.3 (29.5)        | 55,277.2 (53.6)    | 103,116.6 (100.0)  |
|              | Unadjusted ACSC hospitalization rate (per 1,000 p-y) (95% CI) | 34.1 (31.5 – 37.0)                             | 22.6 (21.0 – 24.4)     | 18.5 (17.4 – 19.7) | 22.4 (21.5 – 23.3) |
| CKD Stage 3b | Number of individuals                                         | 453                                            | 555                    | 762                | 1,770              |
|              | Total number of ACSC hospitalizations (%)                     | 699                                            | 817                    | 1,154              | 2,670              |
|              | Number of ACSC hospitalizations, median (IQR)                 | 0 (0 – 0)                                      | 0 (0 – 0)              | 0 (0 – 0)          | 0 (0 – 0)          |
|              | Person-time, years (% of all person-time)                     | 11,014.5 (18.6)                                | 17,789.3 (30.0)        | 30,451.5 (51.4)    | 59,255.4 (100.0)   |
|              | Unadjusted ACSC hospitalization rate (per 1,000 p-y) (95% CI) | 63.5 (58.9 – 68.3)                             | 45.9 (42.9 – 49.2)     | 37.9 (35.8 – 40.2) | 45.1 (43.4 – 46.8) |
| CK           | Number of individuals                                         | 251                                            | 325                    | 374                | 950                |

|  |                                                               |                      |                     |                    |                    |
|--|---------------------------------------------------------------|----------------------|---------------------|--------------------|--------------------|
|  | Total number of ACSC hospitalizations (%)                     | 421                  | 539                 | 552                | 1,512              |
|  | Number of ACSC hospitalizations, median (IQR)                 | 0 (0 – 0)            | 0 (0 – 0)           | 0 (0 – 0)          | 0 (0 – 0)          |
|  | Person-time, years (% of all person-time)                     | 3,877 (21.6)         | 5,458.8 (30.4)      | 8,593.7 (47.9)     | 17,929.9 (100.0)   |
|  | Unadjusted ACSC hospitalization rate (per 1,000 p-y) (95% CI) | 108.6 (98.7 – 119.5) | 98.7 (90.7 – 107.4) | 64.2 (59.1 – 69.8) | 84.3 (80.2 – 88.7) |

**Supplemental Table 6. Ambulatory care-sensitive condition (ACSC) related Emergency Department (ED) characteristics by level of continuity of primary care, overall and across CKD stage.**

|              | Variable                                               | Level of relational continuity of primary care |                        |                    | Overall            |
|--------------|--------------------------------------------------------|------------------------------------------------|------------------------|--------------------|--------------------|
|              |                                                        | Poor<br>(<50%)                                 | Moderate<br>(50 – 74%) | High<br>(75-100%)  |                    |
| Overall      | Number of individuals                                  | 1,414                                          | 1,731                  | 2,272              | 5,417              |
|              | Total number of ACSC ED visits (%)                     | 2,294 (27.1)                                   | 2,726 (32.2)           | 3,441 (40.7)       | 8,461 (100.0)      |
|              | Number of ACSC ED visits, median (IQR)                 | 0 (0 – 0)                                      | 0 (0 – 0)              | 0 (0 – 0)          | 0 (0 – 0)          |
|              | Person-time, years (% of all person-time)              | 32,328.8 (17.9)                                | 53,698.6 (29.7)        | 94,520.5 (52.4)    | 180,547.9 (100.0)  |
|              | Unadjusted ACSC ED visit rate (per 1,000 p-y) (95% CI) | 71.0 (68.2 – 74.0)                             | 50.8 (48.9 – 62.7)     | 36.5 (35.3 – 37.7) | 46.9 (45.9 – 47.9) |
| CKD Stage 3a | Number of individuals                                  | 514                                            | 633                    | 876                | 2,023              |
|              | Total number of ACSC ED visits (%)                     | 827                                            | 972                    | 1,283              | 3,082              |
|              | Number of ACSC ED visits, median (IQR)                 | 0 (0 – 0)                                      | 0 (0 – 0)              | 0 (0 – 0)          | 0 (0 – 0)          |
|              | Person-time, years (% of all person-time)              | 17,409.1 (16.9)                                | 30,430.3 (29.5)        | 55,277.2 (53.6)    | 103,116.6 (100.0)  |
|              | Unadjusted ACSC ED visit rate (per 1,000 p-y) (95% CI) | 47.5 (44.4 – 50.9)                             | 31.9 (30.0 – 34.0)     | 23.2 (22.0 – 24.5) | 29.9 (28.9 – 31.0) |
| CKD Stage 3b | Number of individuals                                  | 569                                            | 695                    | 920                | 2,184              |
|              | Total number of ACSC ED visits (%)                     | 935                                            | 1,080                  | 1,415              | 3,430              |
|              | Number of ACSC ED visits, median (IQR)                 | 0 (0 – 0)                                      | 0 (0 – 0)              | 0 (0 – 0)          | 0 (0 – 0)          |
|              | Person-time, years (% of all person-time)              | 11,014.5 (18.6)                                | 17,789.3 (30.0)        | 30,451.5 (51.4)    | 59,255.4 (100.0)   |
|              | Unadjusted ACSC ED visit rate (per 1,000 p-y) (95% CI) | 85.9 (79.6 – 90.5)                             | 60.7 (57.2 – 64.4)     | 46.5 (44.1 – 49.0) | 57.9 (56.0 – 59.9) |



|             |                                                        |                       |                       |                    |                       |
|-------------|--------------------------------------------------------|-----------------------|-----------------------|--------------------|-----------------------|
| CKD Stage 4 | Number of individuals                                  | 331                   | 403                   | 476                | 1,210                 |
|             | Total number of ACSC ED visits (%)                     | 532                   | 674                   | 743                | 1,949                 |
|             | Number of ACSC ED visits, median (IQR)                 | 0 (0 – 0)             | 0 (0 – 0)             | 0 (0 – 0)          | 0 (0 – 0)             |
|             | Person-time, years (% of all person-time)              | 3,877 (21.6)          | 5,458.8 (30.4)        | 8,593.7 (47.9)     | 17,929.9 (100.0)      |
|             | Unadjusted ACSC ED visit rate (per 1,000 p-y) (95% CI) | 137.2 (126.0 – 149.4) | 123.5 (114.5 – 133.2) | 86.5 (80.5 – 92.9) | 108.7 (104.0 – 113.6) |

**Supplemental Table 7. Proportion of individuals who were prescribed a RAAS inhibitor or statin in the year prior to CKD diagnosis date by continuity of primary care.**

|                                                 |            | Level of continuity of primary care |                     |                | Overall       |
|-------------------------------------------------|------------|-------------------------------------|---------------------|----------------|---------------|
|                                                 |            | Poor (<50%)                         | Moderate (50 – 74%) | High (75-100%) |               |
| RAAS inhibitor<br>in the year prior<br>to index | No, n (%)  | 6,606 (41.3)                        | 11,203 (43.6)       | 19,069 (43.5)  | 36,878 (43.1) |
|                                                 | Yes, n (%) | 9,387 (58.7)                        | 14,500 (56.4)       | 24,761 (56.5)  | 48,648 (56.9) |
|                                                 | Overall, n | 15,993                              | 25,703              | 43,830         | 85,526        |
| Statin in the<br>year prior to<br>index         | No, n (%)  | 15,102 (94.4)                       | 24,056 (93.6)       | 40,615 (92.7)  | 79,773 (93.3) |
|                                                 | Yes, n (%) | 891 (5.6)                           | 1,647 (6.4)         | 3,215 (7.3)    | 5,753 (6.7)   |
|                                                 | Overall, n | 15,993                              | 25,703              | 43,830         | 85,526        |
